# Supplementary material for: Modelling of discharges from Baltic Sea shipping
Source: Copernicus journal article supplement (doi:10.5194/os-17-699-2021), 2021-05-28
Supplement: Supplementary file 1 [file os-17-699-2021-supplement.zip]

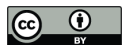

## *Supplement of*

# **Modelling of discharges from Baltic Sea shipping**

**Jukka-Pekka Jalkanen et al.**

*Correspondence to:* Jukka-Pekka Jalkanen ([jukka-pekka.jalkanen@fmi.fi](mailto:jukka-pekka.jalkanen@fmi.fi))

- [os-17-699-2021-supplement-title-page.pdf](#)
- [Jalkanen et al\\_Modeling\\_of\\_Discharges\\_from\\_Baltic\\_Sea\\_Shipping\\_2012\\_SummaryTable\\_STEAM.xlsx](#)
- [Jalkanen et al\\_Modeling\\_of\\_Discharges\\_from\\_Baltic\\_Sea\\_Shipping\\_2012\\_Additional\\_Images\\_Landsat\\_Reference.docx](#)
- [Jalkanen et al\\_Modeling\\_of\\_Discharges\\_from\\_Baltic\\_Sea\\_Shipping\\_Water\\_Analysis\\_Review.xlsx](#)

The copyright of individual parts of the supplement might differ from the article licence.
